# Supplementary material
Source: publisher figshare collection journal article supplement (https://wiley.figshare.com/articles/dataset/_/3529607)
Supplement: Supplementary file 1 [file 1]

**Tom Lindström, Nina Håkansson, Lars Westerberg, and Uno Wennergren. 2008. Splitting the tail of the displacement kernel shows the unimportance of kurtosis. *Ecology* 89:1784–1790.**

## Appendix A

### *Implicit derivation of variance and kurtosis in a two dimensional displacement function.*

Displacement was modelled as a symmetric kernel where the proportion,  $P$ , of the population starting in one cell ending up at a distance,  $D$ , after one time step.

$$P(D) = \frac{e^{-\left(\frac{D}{a}\right)^b}}{S} \quad (\text{A.1})$$

where  $b$  and  $a$  are parameters regulating  $\nu$  and  $\kappa$  of the displacement function. Kernels given by this equation includes uniform ( $b=\infty$ ), Gaussian ( $b=2$ ) and Laplace ( $b=1$ ) distributions.  $S$  scales the cumulative probability to one. In our case we have two-dimensional dispersal and  $S$  is therefore the volume under the kernel. This is given by

$$S = 2\pi \frac{a^2}{b} \Gamma\left(\frac{2}{b}\right)$$

$\nu$  depends on both  $b$  and  $a$  and is given by

$$\nu = a^2 \cdot \frac{\Gamma\left(\frac{4}{b}\right)}{\Gamma\left(\frac{2}{b}\right)}$$

where  $\Gamma$  is the gamma function.  $\kappa$  depends only on  $b$  and is given by

$$\kappa = \frac{\Gamma\left(\frac{6}{b}\right) \cdot \Gamma\left(\frac{2}{b}\right)}{\left(\Gamma\left(\frac{4}{b}\right)\right)^2} \quad (\text{A.2})$$

To get kernels with given  $\nu$  and  $\kappa$ ,  $b$  and  $a$  must be calculated from these.  $b$  can not be solved explicitly but can be given implicitly from Eq. A.2.  $a$  can then be given from  $\nu$  and  $b$  as

$$a = \sqrt{\frac{\nu \cdot \Gamma\left(\frac{2}{b}\right)}{\Gamma\left(\frac{4}{b}\right)}}$$

The variance and kurtosis of Eq. A.1 is limited by  $0 < \nu < \infty$ ,  $4/3 < \kappa < \infty$ .
